# Supplementary material for: The Splicing Factor hnRNP M Is a Critical Regulator of Innate Immune Gene Expression in Macrophages
Source: PubMed Central journal article supplement — Cell Rep. Author manuscript; Available in PMC 2020 Jan 25. (PMC6981299; doi:10.1016/j.celrep.2019.09.078), 2019-11-05
Supplement: NIHMS1542669-supplement-1.pdf [file NIHMS1542669-supplement-1.pdf]

**Cell Reports, Volume 29**

**Supplemental Information**

**The Splicing Factor hnRNP M Is  
a Critical Regulator of Innate Immune  
Gene Expression in Macrophages**

**Kelsi O. West, Haley M. Scott, Sylvia Torres-Odio, A. Phillip West, Kristin L. Patrick, and Robert O. Watson**

**Supplemental Information**  
**West et al. 2019**

**Figure S1. Related to Figure 1.** hnRNP M regulates expression of specific immune genes during *Salmonella* Typhimurium infection

**Table S1. Related to Figure 1.** RNA-Seq expression results of hnRNP M KD compared to SCR control for uninfected and *Salmonella*-infected samples

**Figure S2. Related to Figure 2.** hnRNP M-dependent gene expression profiles are similar amongst diverse immune stimuli

**Table S2. Related to Figure 2.** Analysis of sequences of target transcripts shows hnRNP M binding consensus motifs in introns of hnRNP M target transcripts.

**Figure S3. Related to Figure 3.** hnRNP M influences gene expression outcomes at the level of pre-mRNA splicing

**Table S3. Related to Figure 3.** hnRNP M eCLIP ENCODE datasets show overlap in hnRNP M binding and target transcripts regulated through splicing from MAJIQ and RNA-Seq data

**Figure S4. Related to Figure 4.** hnRNP M associates with chromatin at the *IL6* genomic locus

**Figure S5. Related to Figure 5.** Specific phosphorylation of hnRNP M controls its ability to repress expression of innate immune transcripts

**Figure S6. Related to Figure 6.** Knockdown of hnRNP M enhances a macrophage's ability to control viral infection

**Figure S7. Related to Figure 7.** hnRNP M may influence differential inclusion of cryptic exons

**Table S4. Related to Figures 1-7.** Oligonucleotides used in this study

A

SCR vs. hnRNP M KD1 Uninfected      SCR vs. hnRNP M KD1 + *Salmonella*

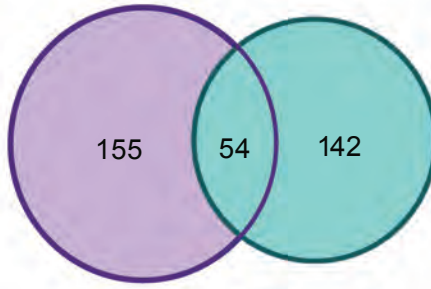

B

Canonical Pathway Analysis: SCR vs. hnRNP M KD1 Uninfected

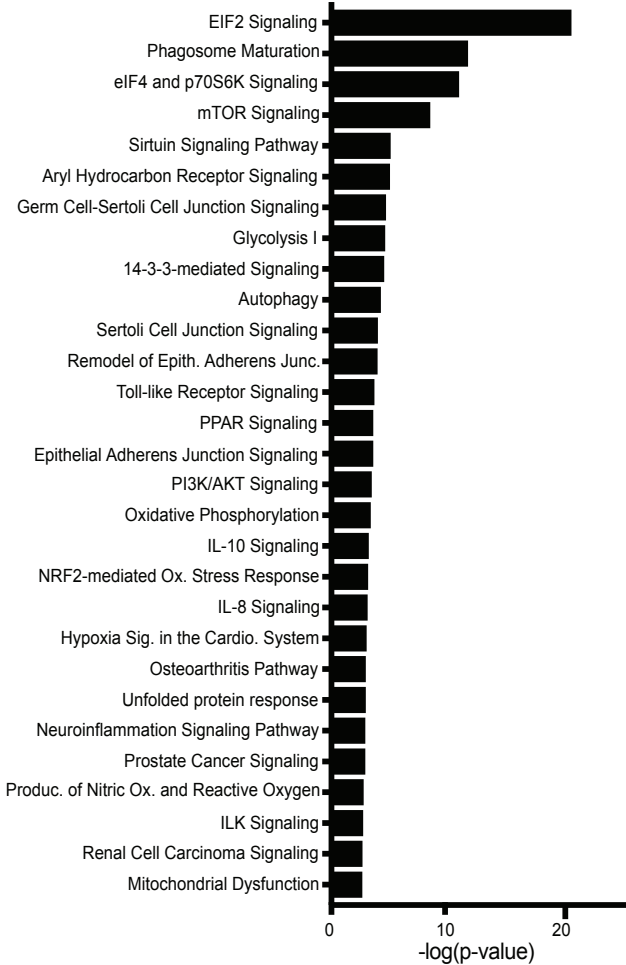

C

Canonical Pathway Analysis: SCR vs. hnRNP M KD1 + STm

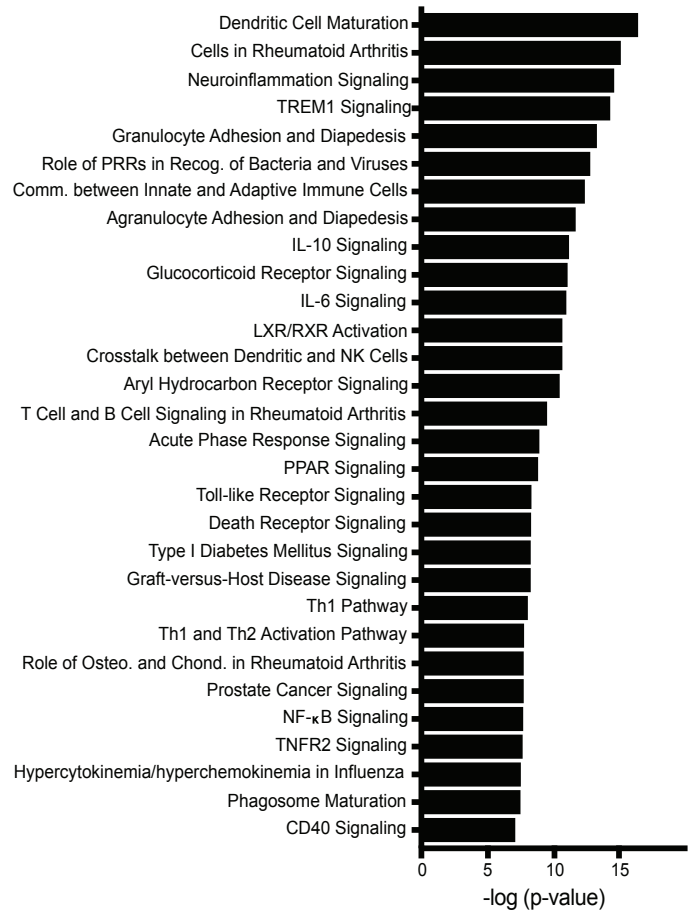

D

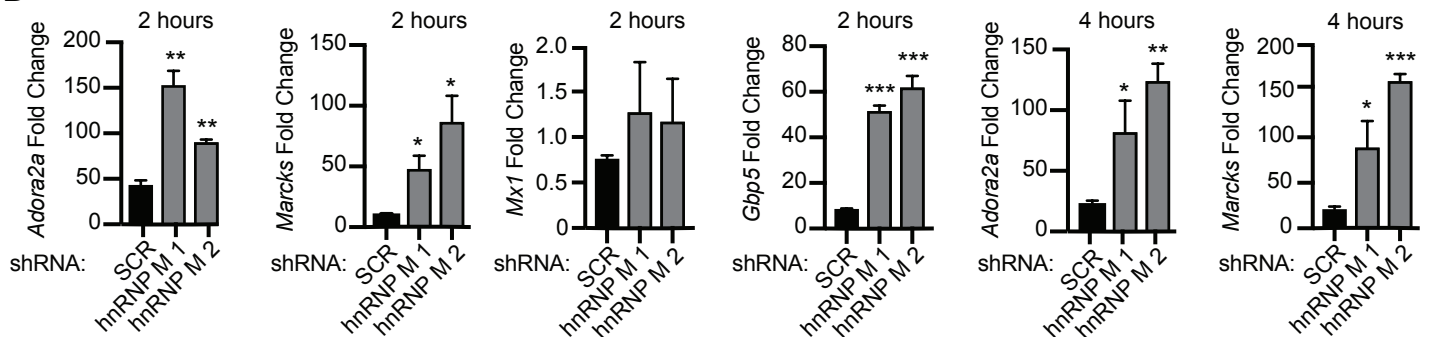

**Figure S1. Related to Figure 1. HnRNP M regulates expression of specific immune genes during *Salmonella* Typhimurium Infection.**

(a) Venn diagram to represent overlap between hnRNP M-regulated transcripts in uninfected and *Salmonella*-infected macrophages. (b) Complete ingenuity pathway analysis for SCR vs. hnRNP M KD uninfected macrophages. (c) Complete ingenuity pathway analysis for SCR vs. hnRNP M KD *Salmonella*-infected macrophages. (d) Gene expression by RT-qPCR in SCR, hnRNP M KD 1, and hnRNP M KD 2 2hr post-*Salmonella* infection for *Adora2a*, *Marcks*, *Mx1*, *Gbp5*, and 4hr for *Adora2a* and *Marcks*.

| RNA-Seq<br>Uninfected |                   | RNA-Seq<br>+ <i>Salmonella</i> |                   |
|-----------------------|-------------------|--------------------------------|-------------------|
| GENE NAME             | FOLD<br>INDUCTION | GENE<br>NAME                   | FOLD<br>INDUCTION |
|                       |                   |                                |                   |
| Hpgd                  | 13.90711          | Fabp7                          | 6.765286          |
| Cxcr4                 | 9.354822          | Ms4a6c                         | 5.454133          |
| Ms4a6c                | 7.745006          | Ms4a4c                         | 4.956656          |
| Csf3r                 | 7.714053          | Ms4a6d                         | 4.288573          |
| Fabp7                 | 5.976491          | Il6                            | 3.957798          |
| S1pr1                 | 5.387236          | Marcks                         | 3.499546          |
| Cd33                  | 4.585221          | Gm16685                        | 3.373171          |
| Ms4a6d                | 4.420621          | Adora2a                        | 3.23969           |
| Neur13                | 3.949566          | Ighm                           | 3.19321           |
| Pros1                 | 3.932567          | Slc28a2                        | 3.177709          |
| Prss46                | 3.472838          | Cfb                            | 3.166876          |
| Prss50                | 3.46898           | Slamf9                         | 3.116945          |
| St6gal1               | 3.419711          | Rpl27-ps3                      | 3.017322          |
| Ighm                  | 3.19321           | Mx1                            | 3.008578          |
| Cd36                  | 3.104169          | Cd36                           | 2.828894          |
| Il10ra                | 3.085386          | Ctsc                           | 2.787805          |
| Gm12166               | 2.956821          | C3                             | 2.569081          |
| Fabp4                 | 2.923715          | Fcgr3                          | 2.480588          |
| Aph1c                 | 2.916988          | Fabp3                          | 2.4082            |
| Fosb                  | 2.85088           | Smpdl3a                        | 2.352208          |
| Atf3                  | 2.832853          | Pld4                           | 2.271779          |
| Tnfrsf1b              | 2.814419          | Nectin2                        | 2.247367          |
| Tgfr1                 | 2.740644          | Dusp1                          | 2.241607          |
| Fcgr3                 | 2.73009           | Cd300e                         | 2.21221           |
| Clec4a3               | 2.694922          | Gm5431                         | 2.182886          |
| Il7r                  | 2.691738          | Havcr2                         | 2.170636          |
| Tmem86a               | 2.672264          | Fcgr2b                         | 2.150546          |
| Cav2                  | 2.651061          | Spen                           | 2.146736          |
| Gm6377                | 2.615475          | C3ar1                          | 2.115022          |
| Cd300c2               | 2.58364           | Cd300c2                        | 2.104473          |
| Fabp3                 | 2.555074          | Siglece                        | 2.089605          |
| Smpdl3a               | 2.51753           | Edn1                           | 2.089051          |
| Ptafr                 | 2.485913          | Cd276                          | 2.056106          |
| Pld4                  | 2.390038          | Tgm2                           | 2.027966          |
| Plk2                  | 2.379248          | Fcgr4                          | 1.997097          |
| Btg2                  | 2.363222          | Gm10260                        | 1.99323           |
| C3ar1                 | 2.210747          | Il10ra                         | 1.978782          |
| Wfdc17                | 2.139324          | Sema4a                         | 1.955406          |
| Cd276                 | 2.135795          | Ccr12                          | 1.938053          |
| Itgam_1               | 2.060784          | Ass1                           | 1.925226          |
| Ctsc                  | 2.051702          | Adgre1                         | 1.866584          |
| Egr2                  | 2.046845          | Il4i1                          | 1.857245          |
| Tgm2                  | 2.039586          | Pik3r6                         | 1.817064          |
| Egr1                  | 1.995767          | Bcl3                           | 1.802364          |
| Dusp1                 | 1.995471          | Tnfsf9                         | 1.799192          |
| Mpeg1                 | 1.96516           | Fcgr1                          | 1.797059          |
| Bhlhe41               | 1.959191          | Igsf6                          | 1.796179          |
| Xdh                   | 1.939404          | Lacc1                          | 1.793885          |
| Lst1                  | 1.919394          | Zc3h12c                        | 1.793278          |
| Lsp1                  | 1.897235          | Gngt2                          | 1.786466          |

|          |          |          |          |
|----------|----------|----------|----------|
| Gnpda1   | 1.891593 | Gm4070   | 1.762879 |
| Tlr13    | 1.876798 | Plk2     | 1.735775 |
| Myo1f    | 1.868713 | Bcl2a1a  | 1.731698 |
| Rap2b    | 1.824333 | Rsad2    | 1.728779 |
| Jun      | 1.818452 | Lsp1     | 1.728275 |
| Arl11    | 1.803489 | Cmpk2    | 1.716878 |
| Rnf26_1  | 1.800696 | Fabp4    | 1.709066 |
| Havcr2   | 1.800502 | Stat5a   | 1.705524 |
| Fblim1   | 1.779344 | Napsa    | 1.704077 |
| Mcoln2   | 1.774978 | Ppp1r15a | 1.686405 |
| Rnf128   | 1.761964 | Gk       | 1.68233  |
| Rab32    | 1.75113  | Myo1f    | 1.677152 |
| Tnfaip2  | 1.726583 | Gpnmb    | 1.675334 |
| Dhrs3    | 1.725571 | Arhgef3  | 1.672991 |
| Litaf    | 1.714146 | Tnfaip3  | 1.661885 |
| Ctsf     | 1.705514 | Nfkbiz   | 1.658248 |
| Cxcl16   | 1.703797 | Syk      | 1.651344 |
| Gstm1    | 1.702554 | Tagap    | 1.645342 |
| Gngt2    | 1.701373 | Itgal    | 1.638434 |
| Zfp385a  | 1.688385 | Tmem51   | 1.636726 |
| Pbxip1   | 1.687734 | Mpeg1    | 1.635068 |
| Hist1h1c | 1.68698  | Cebpb    | 1.63348  |
| Gpnmb    | 1.672091 | Dusp2    | 1.627537 |
| Napsa    | 1.658448 | Ctsf     | 1.621343 |
| Fos      | 1.652633 | Fam129a  | 1.620868 |
| Cotl1    | 1.646704 | Zfp36    | 1.62075  |
| Slc15a4  | 1.638645 | Saa3     | 1.617704 |
| Tmem51   | 1.636726 | Slc44a1  | 1.610821 |
| Id3      | 1.631679 | Ldlr     | 1.600648 |
| Slc44a1  | 1.628823 | Ptafr    | 1.600574 |
| Ier2     | 1.613946 | Fam177a  | 1.598248 |
| Msrb1    | 1.611736 | Birc3    | 1.591189 |
| Il10rb   | 1.603    | Anpep    | 1.587615 |
| Bcl2a1d  | 1.597259 | Myo1g    | 1.58755  |
| Cttnb1   | 1.585479 | Tnfrsf1b | 1.587515 |
| Slc6a8   | 1.582178 | Il18     | 1.582494 |
| Nceh1    | 1.57352  | Tnfaip2  | 1.546983 |
| Sptssa   | 1.571322 | Cxcl16   | 1.538268 |
| Gyg      | 1.565705 | Traf1    | 1.533961 |
| Rgs2     | 1.565309 | Gbp5     | 1.531947 |
| Plin2    | 1.563214 | Blnk     | 1.531359 |
| B4galt1  | 1.550249 | Atf3     | 1.530953 |
| Rnh1     | 1.536697 | Gadd45b  | 1.526009 |
| Tbc1d16  | 1.521571 | Lrrc25   | 1.515623 |
| Zfp36    | 1.515133 | Jak2     | 1.509944 |
| Fabp5    | 1.507761 | Icam1    | 1.501014 |
| Cybb     | 1.506247 | Capg     | -1.43733 |
| Anpep    | 1.50344  | Ubald2   | -1.50115 |
| Alox5ap  | 1.500911 | Rab31    | -1.50144 |
| Pdia3    | -1.50295 | Pdia3    | -1.51841 |
| Tubb6    | -1.50417 | Atp1b3   | -1.5477  |
| Tmsb10   | -1.50845 | Snx9     | -1.56831 |
| Sumo2    | -1.53189 | Ets2     | -1.60419 |
| Ccl3     | -1.54719 | Plau     | -1.60747 |

|               |          |           |          |
|---------------|----------|-----------|----------|
| Pip5k1b       | -1.56974 | Naa25     | -1.60934 |
| Hmga2         | -1.58317 | Gm26619   | -1.6641  |
| Atp1b3        | -1.58414 | Mrps6     | -1.67118 |
| Ank           | -1.5913  | Spp1      | -1.67374 |
| Cpne8         | -1.59717 | Tfdp1     | -1.67919 |
| Fcrl1         | -1.61248 | Serinc2   | -1.69061 |
| Rbpj          | -1.61302 | Tmem98    | -1.70829 |
| Tfdp1         | -1.61335 | Dhrs9     | -1.71239 |
| Slc6a12       | -1.61529 | Rpl10-ps3 | -1.73337 |
| Snx9          | -1.62045 | Spink5    | -1.77682 |
| Preli2        | -1.64498 | Epn2      | -1.79498 |
| Slc16a3       | -1.65921 | Ccz1      | -1.81366 |
| Fosl2         | -1.65925 | Ier3      | -1.86244 |
| Mrps6         | -1.68031 | Acy1      | -1.8627  |
| Acot7         | -1.71671 | Ccl17     | -1.86471 |
| Oas2          | -1.71742 | Ccnd1     | -1.87697 |
| Ehd1          | -1.75186 | Lif       | -1.88307 |
| Ccnd1         | -1.78697 | Rgs16     | -1.91798 |
| Marcksl1      | -1.81918 | Csf3      | -1.99019 |
| Bnip3         | -1.84262 | Npl       | -2.01377 |
| Ak4           | -1.84773 | Timp1     | -2.02017 |
| Ets2          | -1.85673 | Hmga2     | -2.04688 |
| Acy1          | -1.86399 | Ccl2      | -2.14895 |
| Isg15         | -1.88973 | Dmpk      | -2.16457 |
| Odc1          | -1.95677 | Tnfsf15   | -2.17432 |
| Gm28037       | -1.96705 | Odc1      | -2.24711 |
| Layn          | -1.96945 | Pdia3     | -2.34015 |
| Naa25         | -2.00186 | Scin      | -2.42501 |
| Plekha3       | -2.06644 | Car2      | -2.49682 |
| Ccz1          | -2.12175 | Kbtbd11   | -2.58657 |
| Gm9803        | -2.13322 | Ccl7      | -2.59416 |
| Rtp4          | -2.18593 | Hnrnpm    | -2.72047 |
| Npl           | -2.19264 | Gm18445   | -2.80579 |
| Spp1          | -2.25665 | Slc6a4    | -2.88423 |
| Dmpk          | -2.4654  | Dmwd      | -3.67138 |
| Emp2          | -2.65804 | Mmp9      | -3.86347 |
| Hnrnpm        | -2.69036 | Tnfsf8    | -4.12014 |
| Fosl1         | -2.78138 | Sema7a    | -4.72083 |
| Spink5        | -2.80455 |           |          |
| Gm18445       | -2.80579 |           |          |
| Tmem26        | -3.02585 |           |          |
| Flt1          | -3.09266 |           |          |
| Serinc2       | -3.27645 |           |          |
| Rgs16         | -3.53479 |           |          |
| Car2          | -3.73217 |           |          |
| Gm21987       | -4.1013  |           |          |
| Dmwd          | -4.16092 |           |          |
| Slc6a4        | -4.72442 |           |          |
| Mmp9          | -6.9746  |           |          |
| 1810011H11Rik | 2.333564 |           |          |
| AB124611      | 1.783388 |           |          |

Table S1

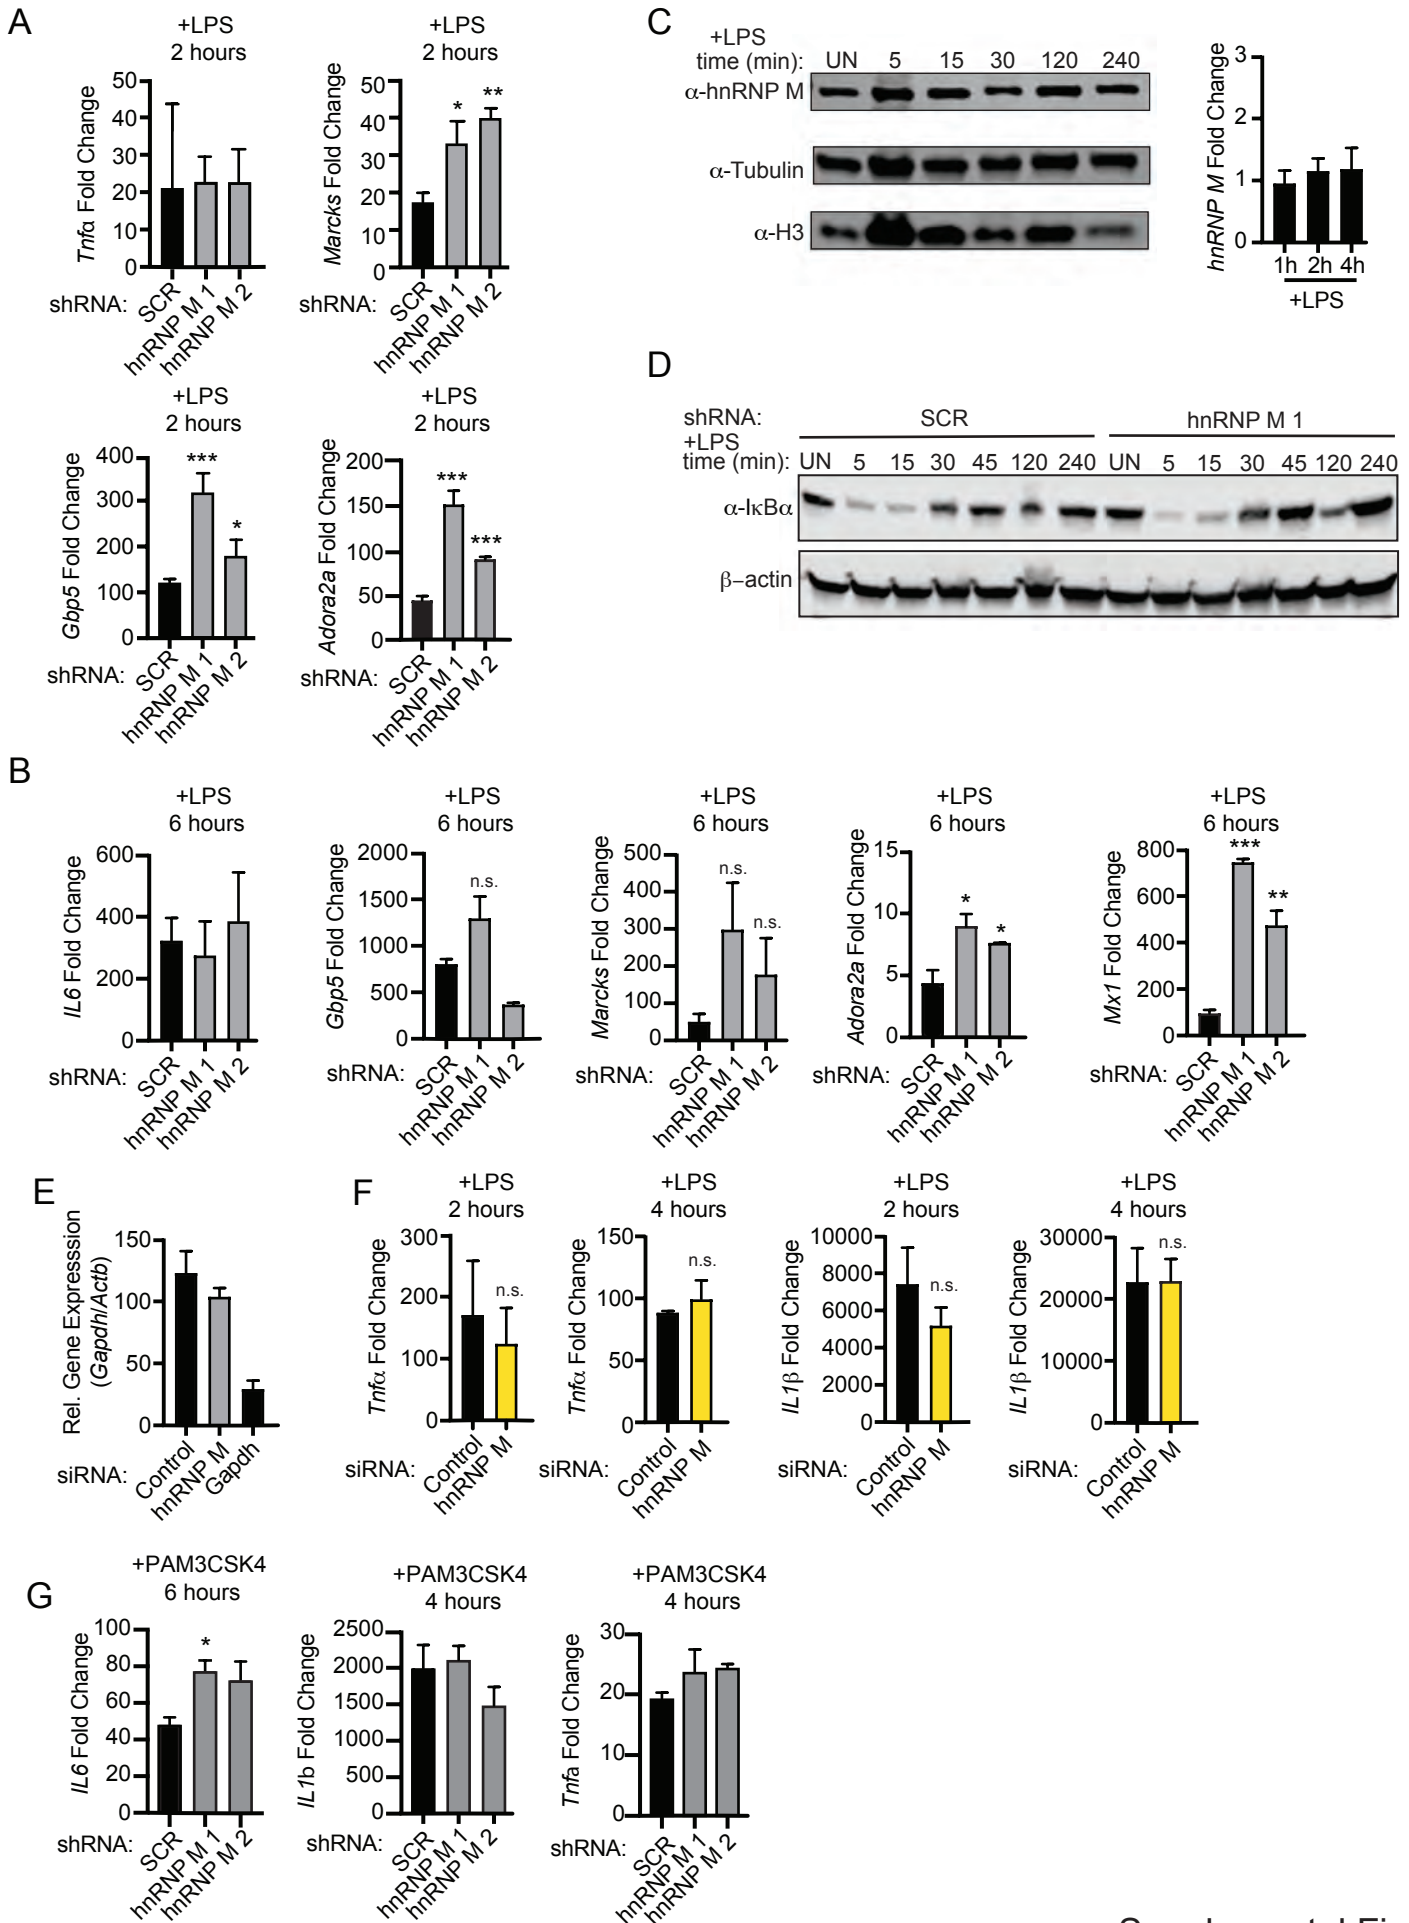



**Figure S2. Related to Figure 2. hnRNP M-dependent gene expression profiles are similar amongst diverse immune stimuli.**

(a) *Tnfa*, *Marcks*, *Gbp5*, and *Adora2a* expression by RT-qPCR in LPS-treated cells of SCR, hnRNP M KD 1, and hnRNP M KD 2 2hr post-treatment. (b) *IL6*, *Gbp5*, *Marcks*, *Adora2a*, and *Mxl* expression by RT-qPCR in SCR, hnRNP M KD1, and hnRNP M KD 2 6hr post-LPS treatment. (c) Western blot analysis of endogenous hnRNP M in RAW 264.7 macrophages treated with LPS for 5, 15, 30, 120, and 240 mins. RT-qPCR of *hnRNP M* expression in RAW 264.7 cells treated with LPS for 1hr, 2hr, and 4hr. (d) Western blot analysis of  $\alpha$ IK $\beta$  in SCR control and hnRNP M KD 1 macrophages treated with LPS for 5, 15, 30, 45, 120, and 240 mins. (e) RT-qPCR demonstrating effective depletion of GAPDH in siRNA transfected BMDMs. (f) RT-qPCR of *Tnfa* and *IL1 $\beta$*  in negative control and hnRNP M siRNA BMDMs treated with 10 ng/ml of LPS for 2hrs and 4hrs. (g) RT-qPCR of *IL6*, *Tnfa*, and *IL1 $\beta$*  in SCR control and hnRNP M KD macrophages treated with PAM3CSK4 for 6hrs and 4hrs.

+ *Salmonella*

Upregulated genes

Downregulated genes

|          | GUGGUGG | GGUUGGUU |           | GUGGUGG | GGUUGGUU |
|----------|---------|----------|-----------|---------|----------|
| Fabp7    |         |          | Ubald2    | +       |          |
| Ms4a6c   | +       |          | Rab31     | +       | +        |
| Ms4a4c   | +       | +        | Pdia3     | +       | +        |
| Ms4a6d   | +       |          | Atp1b3    | +       | +        |
| Il6      | +       |          | Snx9      | +       | +        |
| Marcks   | +       |          | Ets2      | +       |          |
| Gm16685  | +       |          | Plau      | +       |          |
| Adora2a  | +       |          | Naa25     | +       | +        |
| Slc28a2  | +       |          | Gm26619   | +       |          |
| Cfb      |         |          | Mrps6     | +       |          |
| Slamf9   |         |          | Spp1      | +       |          |
| Mx1      | +       |          | Tfdp1     | +       | +        |
| Cd36     | +       | +        | Serinc2   | +       |          |
| Ctsc     | +       |          | Tmem98    | +       |          |
| C3       | +       | +        | Dhrs9     |         |          |
| Fcgr3    | +       | +        | Rpl10-ps3 |         |          |
| Fabp3    |         |          | Spink5    | +       |          |
| Smpd13a  | +       |          | Epn2      | +       | +        |
| Pld4     | +       |          | Ccz1      | +       |          |
| Nectin2  | +       | +        | Ier3      |         |          |
| Dusp1    |         |          | Acy1      | +       |          |
| Cd300e   | +       |          | Ccl17     |         |          |
| Gm5431   | +       | +        | Ccnd1     | +       |          |
| Siglece  | +       |          | Lif       | +       |          |
| Havcr2   | +       | +        | Rgs16     | +       |          |
| Fcgr2    | +       |          | Csf3      |         |          |
| Spn      | +       | +        | Npl       | +       | +        |
| C3ar1    | +       |          | Timp1     | +       |          |
| Cd300c2  | +       |          | Hmga2     | +       | +        |
| Edn1     |         |          | Ccl2      |         |          |
| Cd276    |         |          | Dmpk      | +       |          |
| Tgm2     | +       | +        | Tnfsf15   | +       |          |
| Fcgr4    | +       | +        | Odc1      | +       |          |
| Gm10260  |         |          | Gm9260    |         |          |
| IL10ra   | +       |          | Scin      | +       | +        |
| Sema4a   | +       |          | Car2      |         |          |
| Ccr12    |         |          | Kbtbd11   | +       |          |
| Ass1     | +       |          | Ccl7      |         |          |
| Adgre    | +       | +        | Hnrnpm    | +       |          |
| Pik3r6   | +       |          | Slc6a4    | +       | +        |
| Il4i1    | +       |          | Dmwd      |         |          |
| Bcl3     | +       |          | Mmp9      | +       |          |
| Tnfsf9   |         |          | Tnfsf8    | +       |          |
| Fcgr1    | +       |          | Sema7a    | +       |          |
| Igsf6    | +       | +        |           |         |          |
| Lacc1    | +       | +        |           |         |          |
| Zc3h12c  | +       |          |           |         |          |
| Gngt2    |         |          |           |         |          |
| Plk2     |         |          |           |         |          |
| Gm4070   | +       |          |           |         |          |
| Bcl2a1a  |         |          |           |         |          |
| Rsad2    | +       |          |           |         |          |
| Lsp1     | +       | +        |           |         |          |
| Cmpk2    | +       |          |           |         |          |
| Fabp4    | +       |          |           |         |          |
| Stat5a   | +       | +        |           |         |          |
| Napsa    | +       |          |           |         |          |
| Ppr1r15a |         |          |           |         |          |
| Gk       | +       | +        |           |         |          |
| Myo1f    | +       |          |           |         |          |
| Gpnmb    | +       | +        |           |         |          |

|          |   |   |  |  |  |
|----------|---|---|--|--|--|
| Arhgef3  | + | + |  |  |  |
| Tnfaip3  | + |   |  |  |  |
| Nfkbiz   | + | + |  |  |  |
| Syk      | + | + |  |  |  |
| Tagap    |   | + |  |  |  |
| Itgal    | + | + |  |  |  |
| Mpeg1    |   |   |  |  |  |
| Cebpb    |   |   |  |  |  |
| Dusp2    |   |   |  |  |  |
| Ctsf     |   |   |  |  |  |
| Fam129a  | + |   |  |  |  |
| Zfp36    |   |   |  |  |  |
| Saa3     | + |   |  |  |  |
| Slc44a1  | + | + |  |  |  |
| Ldlr     | + |   |  |  |  |
| Ptafr    | + | + |  |  |  |
| Acp2     | + |   |  |  |  |
| Fam177a  | + |   |  |  |  |
| Birc3    | + |   |  |  |  |
| Anpep    | + |   |  |  |  |
| Myo1g    | + |   |  |  |  |
| Tnfrsf1b | + | + |  |  |  |
| Il18     | + |   |  |  |  |
| Tnfaip2  |   |   |  |  |  |
| Cxcl16   |   |   |  |  |  |
| Traf1    | + | + |  |  |  |
| Gbp5     | + |   |  |  |  |
| Blnk     | + |   |  |  |  |
| Atf3     |   |   |  |  |  |
| Lrrc25   | + |   |  |  |  |
| Jak2     | + | + |  |  |  |
| Gadd45b  |   |   |  |  |  |
| Icam1    | + | + |  |  |  |

Table S2

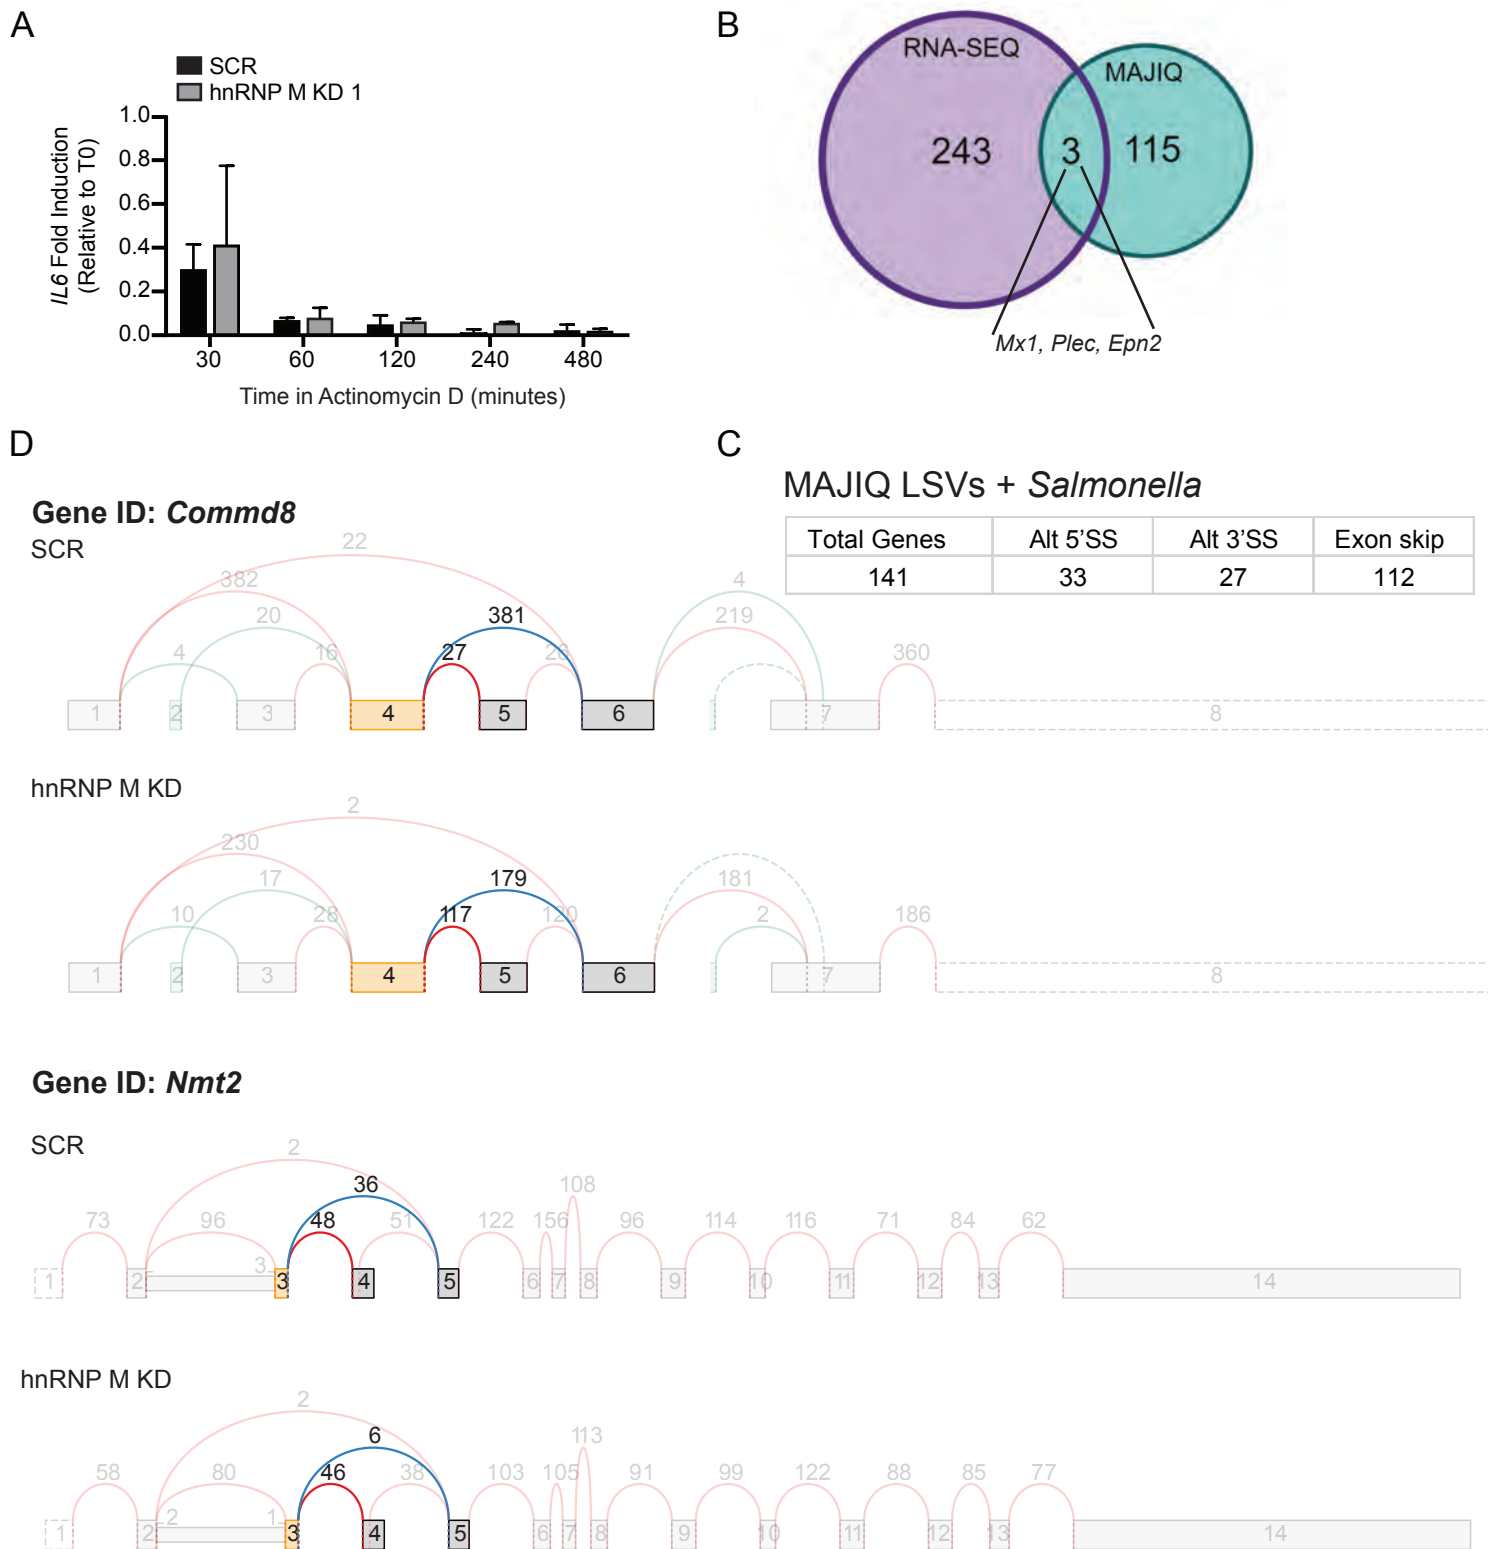

**Figure S3. Related to Figure 3. hnRNP M influences gene expression outcomes at the level of pre-mRNA splicing.**

(a) IL6 expression by RT-qPCR in SCR, hnRNP M KD1 cells treated with LPS for 1hr then treated with Actinomycin D for 0, 30, 60, 120, 240, and 480 mins. (b) Venn diagram to represent overlap between hnRNP M-regulated transcripts identified via RNA-Seq analysis (unique genes identified in *Salmonella* and uninfected analyses) and hnRNP M-dependent LSVs identified via MAJIQ analysis (total number of unique LSV events from both *Salmonella* and uninfected conditions). (c) Categorization of alternative splicing events identified via MAJIQ in uninfected vs. *Salmonella*-infected samples. (d) Full VOILA-generated tracks for *Commd8* and *Nmt2*. Significant LSVs are shown in color.

| MAJIQ GENES (UN+SAL) | Found in eCLIP (ENCODE) | RNA-Seq Uninfected | Found in eCLIP (ENCODE) | RNA-Seq + <i>Salmonella</i> | Found in eCLIP (ENCODE) |
|----------------------|-------------------------|--------------------|-------------------------|-----------------------------|-------------------------|
| 1190007107Rik        |                         |                    |                         | Fabp7                       |                         |
| Acvr1                | *                       | Hpgd               |                         | Ms4a6                       |                         |
| Aldh3a2              |                         | Cxcr4              |                         | Ms4a4c                      |                         |
| Amotl1               | *                       | Ms4a6c             |                         | Ms4a6d                      |                         |
| Asxl1                | *                       | Csf3r              |                         | Il6                         |                         |
| Atxn2                | *                       | Fabp7              |                         | Marcks                      | *                       |
| Auh                  | *                       | S1pr1              |                         | Gm16685                     |                         |
| Ccne2                |                         | Cd33               |                         | Adora2a                     | *                       |
| Chka                 | *                       | Ms4a6d             |                         | Ighm                        | *                       |
| Cnot4                | *                       | Neur13             |                         | Slc28a2                     |                         |
| Commd8               |                         | Pros1              | *                       | Cfb                         |                         |
| Dcaf8                | *                       | Prss46             |                         | Slamf9                      |                         |
| Desi2                | *                       | Prss50             |                         | Rpl27-ps3                   |                         |
| Dock10               |                         | St6gal1            | *                       | Mx1                         |                         |
| Dtx2                 | *                       | Ighm               |                         | Cd36                        |                         |
| Ercc8                |                         | Cd36               |                         | Ctsc                        | *                       |
| Frmd4a               | *                       | Il10ra             |                         | C3                          |                         |
| Gfod1                | *                       | Gm12166            |                         | Fcgr3                       |                         |
| Gm29247              |                         | Fabp4              |                         | Fabp3                       |                         |
| Hps5                 |                         | Aph1c              |                         | Smpd13a                     |                         |
| Ist1                 | *                       | Fosb               |                         | Pld4                        |                         |
| Kat6a                | *                       | Atf3               |                         | Nectin2                     |                         |
| Kat6a                |                         | Tnfrsf1b           |                         | Dusp1                       |                         |
| Klf7                 | *                       | Tgfbr1             | *                       | Cd300e                      |                         |
| Ktn1                 | *                       | Fcgr3              |                         | Gm5431                      |                         |
| Lrmp                 |                         | Clec4a3            |                         | Havcr2                      |                         |
| Mdm4                 | *                       | Il7r               |                         | Fcgr2b                      |                         |
| Mx1                  |                         | Tmem86a            |                         | Spen                        | *                       |
| Nmt2                 | *                       | Cav2               |                         | C3ar1                       |                         |
| Numb                 |                         | Gm6377             |                         | Cd300c2                     |                         |
| Pak1                 | *                       | Cd300c2            |                         | Siglece                     |                         |
| Pds5b                | *                       | Fabp3              |                         | Edn1                        |                         |
| Phactr4              | *                       | Smpd13a            | *                       | Cd276                       | *                       |
| Plec                 | *                       | Ptafr              |                         | Tgm2                        |                         |
| Plxnc1               |                         | Pld4               |                         | Fcgr4                       |                         |
| Rpl22                | *                       | Plk2               |                         | Gm10260                     |                         |
| Sec14l1              | *                       | Btg2               |                         | Il10ra                      |                         |
| Senp1                |                         | C3ar1              |                         | Sema4a                      |                         |
| Senp6                | *                       | Wfdc17             |                         | Ccr12                       |                         |
| Smc6                 |                         | Cd276              | *                       | Ass1                        | *                       |
| Tbc1d7               |                         | Itgam_1            |                         | Adgre1                      |                         |
| Tex30                |                         | Ctsc               | *                       | Il4i1                       | *                       |
| Tmem87a              | *                       | Egr2               |                         | Pik3r6                      |                         |
| Trmu                 | *                       | Tgm2               |                         | Bcl3                        |                         |
| Ubqln1               | *                       | Egr1               | *                       | Tnfsf9                      |                         |
| Xpo6                 |                         | Dusp1              |                         | Fcgr1                       |                         |
| Zfyve27              | *                       | Mpeg1              |                         | Igsf6                       |                         |
| Zmynd8               | *                       | Bhlhe41            |                         | Lacc1                       |                         |
| 1110051M20Rik        |                         | Xdh                |                         | Zc3h12c                     |                         |
| 4833420G17Rik        |                         | Lst1               |                         | Gngt2                       |                         |
| Ankra2               |                         | Lsp1               |                         | Gm4070                      |                         |
| Aplp2                | *                       | Gnpda1             |                         | Plk2                        |                         |
| Atf2                 | *                       | Tlr13              |                         | Bcl2a1a                     |                         |
| Ccdc77               |                         | Myo1f              |                         | Rsad2                       |                         |
| Ccdc82               | *                       | Rap2b              |                         | Lsp1                        |                         |
| Clk4                 | *                       | Jun                |                         | Cmpk2                       |                         |
| Csnk1d               | *                       | Arl11              |                         | Fabp4                       |                         |
| Def8                 | *                       | Rnf26_1            |                         | Stat5a                      | *                       |
| Dmac2                |                         | Havcr2             |                         | Napsa                       |                         |
| Ehmt1                | *                       | Fblim1             |                         | Ppp1r15a                    |                         |

|          |   |          |   |           |   |
|----------|---|----------|---|-----------|---|
| Emsy     | * | Mcoln2   | * | Gk        |   |
| Epn2     | * | Rnf128   |   | Myo1f     |   |
| Fbxo34   | * | Rab32    |   | Gpnmb     |   |
| Foxd2os  |   | Tnfaip2  | * | Arhgef3   | * |
| Foxo3    | * | Dhrs3    | * | Tnfaip3   | * |
| Gabpb2   |   | Litaf    | * | Nfkbiz    | * |
| Ggta1    |   | Ctsf     |   | Syk       |   |
| Gm46430  |   | Cxcl16   |   | Tagap     |   |
| Golgb1   | * | Gstm1    |   | Itgal     |   |
| Herc2    | * | Gngt2    |   | Tmem51    | * |
| Lair1    |   | Zfp385a  |   | Mpeg1     |   |
| Luzp1    | * | Pbxip1   |   | Cebpb     |   |
| Lyar     |   | Hist1h1c |   | Dusp2     |   |
| Mettl2   |   | Gpnmb    |   | Ctsf      |   |
| Mycbp2   | * | Napsa    |   | Fam129a   |   |
| Myo18a   | * | Fos      |   | Zfp36     |   |
| Ncapg2   | * | Cotl1    |   | Saa3      |   |
| Nsmaf    | * | Slc15a4  | * | Slc44a1   | * |
| Panx1    |   | Tmem51   |   | Ldlr      |   |
| Patz1    | * | Id3      |   | Ptafr     |   |
| Ppcdc    |   | Slc44a1  | * | Fam177a   |   |
| Ppp2r5c  | * | Ier2     | * | Birc3     |   |
| Pradc1   |   | Msrb1    |   | Anpep     |   |
| Prepl    |   | Il10rb   |   | Myo1g     |   |
| Prr14    | * | Bcl2a1d  |   | Tnfrsf1b  |   |
| Ptger4   |   | Ctnnb1   | * | Il18      |   |
| Ptpn4    | * | Slc6a8   |   | Tnfaip2   | * |
| Rnf20    |   | Nceh1    |   | Cxcl16    |   |
| Snx12    |   | Sptssa   | * | Traf1     |   |
| Sptan1   |   | Gyg      |   | Gbp5      |   |
| Srrm2    | * | Rgs2     |   | Blnk      |   |
| St7      | * | Plin2    |   | Atf3      |   |
| Tmem161b | * | B4galt1  | * | Gadd45b   |   |
| Tmem229b |   | Rnh1     |   | Lrrc25    |   |
| Tmem80   |   | Tbc1d16  |   | Jak2      | * |
| Ttc13    | * | Zfp36    |   | Icam1     |   |
| Vegfa    |   | Fabp5    |   | Capg      | * |
| Zmym3    |   | Cybb     |   | Ubal2     |   |
|          |   | Anpep    |   | Rab31     | * |
|          |   | Alox5ap  |   | Pdia3     |   |
|          |   | Pdia3    |   | Atp1b3    | * |
|          |   | Tubb6    |   | Snx9      | * |
|          |   | Tmsb10   |   | Ets2      | * |
|          |   | Sumo2    |   | Plau      | * |
|          |   | Ccl3     |   | Naa25     |   |
|          |   | Pip5k1b  | * | Gm26619   |   |
|          |   | Hmga2    | * | Mrps6     | * |
|          |   | Atp1b3   | * | Spp1      |   |
|          |   | Ank      | * | Tfdp1     | * |
|          |   | Cpne8    | * | Serinc2   |   |
|          |   | Fcrl1    |   | Tmem98    |   |
|          |   | Rbpj     | * | Dhrs9     |   |
|          |   | Tfdp1    | * | Rpl10-ps3 | * |
|          |   | Slc6a12  |   | Spink5    |   |
|          |   | Snx9     | * | Epn2      | * |
|          |   | Preli2   | * | Ccz1      |   |
|          |   | Slc16a3  |   | Ier3      |   |
|          |   | Fosl2    |   | Acy1      |   |
|          |   | Mrps6    | * | Ccl17     |   |
|          |   | Acot7    |   | Ccnd1     |   |
|          |   | Oas2     |   | Lif       |   |
|          |   | Ehd1     |   | Rgs16     |   |
|          |   | Ccnd1    |   | Csf3      |   |
|          |   | Marcks1  | * | Npl       |   |
|          |   | Bnip3    | * | Timp1     |   |

|  |               |   |         |   |
|--|---------------|---|---------|---|
|  | Ak4           | * | Hmga2   | * |
|  | Ets2          | * | Ccl2    |   |
|  | Acy1          |   | Dmpk    |   |
|  | Isg15         |   | Tnfsf15 |   |
|  | Odc1          | * | Odc1    | * |
|  | Gm28037       |   | Pdia3   |   |
|  | Layn          |   | Scin    |   |
|  | Naa25         | * | Car2    |   |
|  | Plekha3       |   | Kbtbd11 | * |
|  | Ccz1          |   | Ccl7    |   |
|  | Gm9803        |   | Hnrnpm  | * |
|  | Rtp4          |   | Gm18445 |   |
|  | Npl           |   | Slc6a4  |   |
|  | Spp1          |   | Dmwd    |   |
|  | Dmpk          |   | Mmp9    |   |
|  | Emp2          |   | Tnfsf8  |   |
|  | Hnrnpm        |   | Sema7a  | * |
|  | Fosl1         |   |         |   |
|  | Spink5        |   |         |   |
|  | Gm18445       |   |         |   |
|  | Tmem26        |   |         |   |
|  | Flt1          |   |         |   |
|  | Serinc2       |   |         |   |
|  | Rgs16         |   |         |   |
|  | Car2          |   |         |   |
|  | Gm21987       |   |         |   |
|  | Dmwd          |   |         |   |
|  | Slc6a4        |   |         |   |
|  | Mmp9          |   |         |   |
|  | 1810011H11Rik |   |         |   |
|  | AB124611      |   |         |   |

Table S3





**Figure S4. Related to Figure 4. hnRNP M associates with chromatin at the *IL6* genomic locus.** (a) Immunofluorescence microscopy of 3xFLAG-hnRNP M in untreated and LPS-treated macrophages (1hr and 2hr post-treatment). (b) Immunofluorescence microscopy of hnRNP U in untreated and LPS-treated macrophages (2hr post-treatment). (c) Western blot of whole cell lysate, cytoplasm, nucleoplasm, and chromatin of fractionated stable 3xFL-hnRNP M-expressing macrophages over a time-course of LPS treatment. (d) Western blot analysis of cellular fractions with anti-hnRNP M and loading controls of cytoplasm (tubulin), nucleoplasm (Snrp70) and chromatin (H3) fractions of uninfected and LPS stimulated hnRNP M KD 1 macrophages. (e) RNA sequence of *IL6* introns 2 and 3. Consensus or near-consensus hnRNP M binding sites are highlighted in yellow.

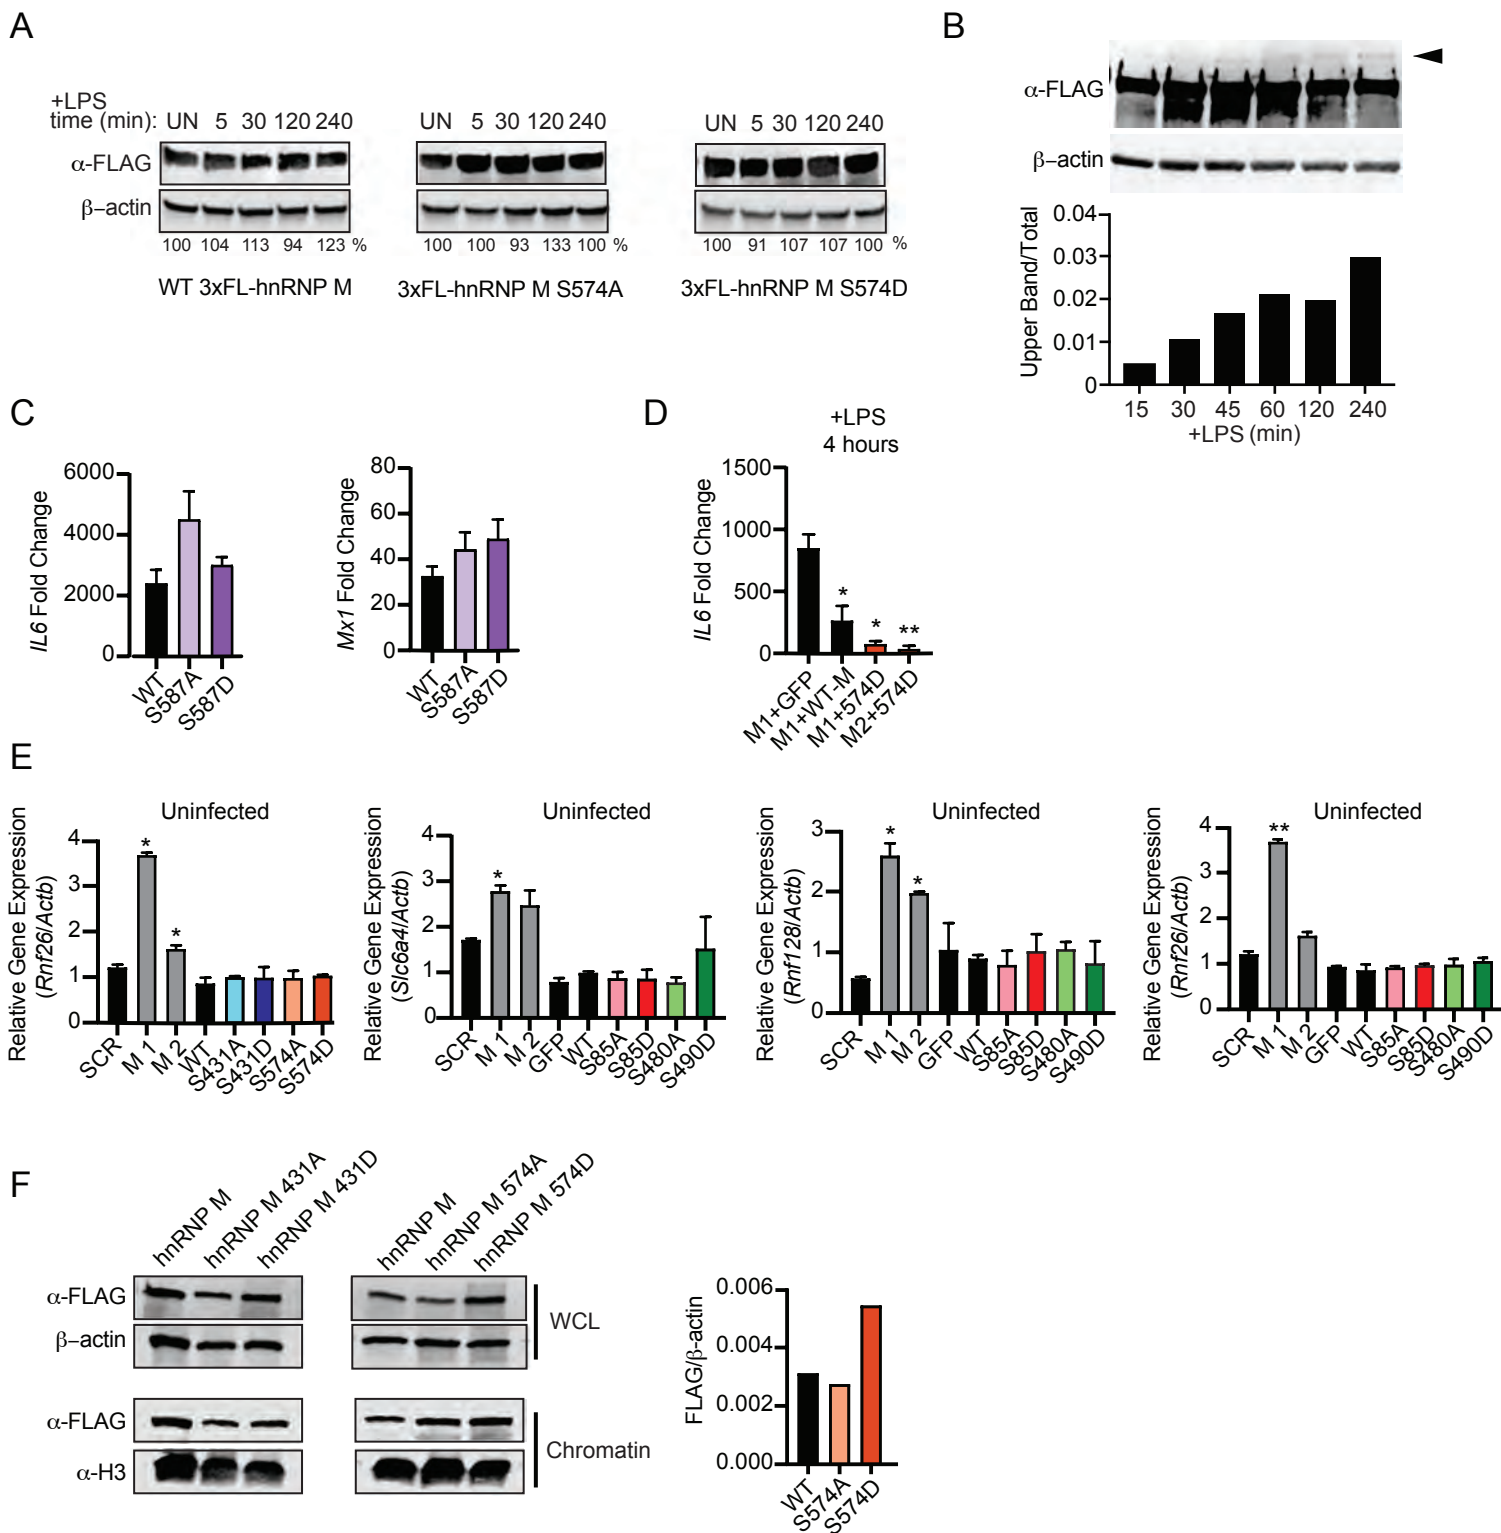

**Figure S5. Related to Figure 5. Specific phosphorylation of hnRNP M controls its ability to repress expression of innate immune transcripts.**

(a) Western blot analysis of 3xFLN-hnRNP M WT, S574A, S574D phosphomutants stably expressed in RAW 264.7 macrophages treated with LPS for 5, 30, 120, and 240 mins. (b) Western blot analysis of phosphorylation events of 3xFLN-hnRNP M WT stably expressed in RAW 264.7 macrophages treated with LPS for 15, 30, 45, 60, 120, and 240 mins. (c) IL6 and Mx1 expression by RT-qPCR, 2hr post-LPS treatment in 3xFLN-hnRNP M WT and 3xFLN-hnRNP M S587A/D-expressing macrophages. (d) IL6 expression by RT-qPCR, 4hr post-LPS treatment in hnRNP M KD 1 macrophages complemented with 3xFLN-GFP, 3xFLN-hnRNP M WT, or S574D and hnRNP M KD 2 macrophages complemented with S574D. (e) Expression by RT-qPCR of Rnf26, Slc6a4, Rnf128 for 3xFLN-hnRNP M WT, hnRNP M KD 1 and hnRNP M KD 2, and 3xFLN-S431A/D, S574A/D, S85A/D, S480A/D-expressing macrophages. (f) Western blot of whole cell lysate and chromatin of fractionated stable 3xFLN-hnRNP M WT, 3xFLN-hnRNP M 431A/D and 3xFLN-hnRNP M 574A/D-expressing macrophages. FLAG expression was quantified over  $\beta$ actin.

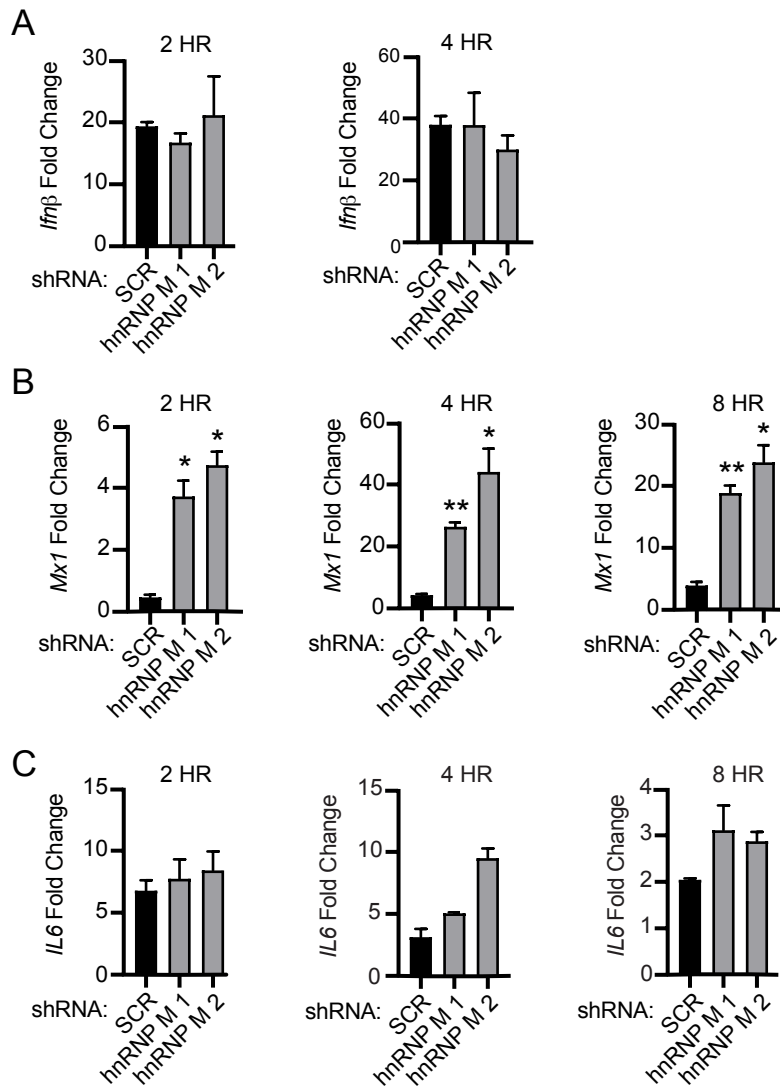

**Figure S6. Related to Figure 6. hnRNP M influences innate immune gene expression during viral infection.**

(a) RT-qPCR of *Ifnβ* mRNA levels in SCR control and hnRNP M KD cells at 2hr and 4hr post-infection, MOI=0.1. (b) RT-qPCR of *Mx1* transcript in VSV infected SCR control and hnRNP M KD cells at 2hr, 4hr, and 8hr post-infection, MOI=0.1. (c) RT-qPCR of *IL6* transcript in SCR control and hnRNP M KD cells at 2hr, 4hr, and 8hr post-infection, MOI=0.1. All figures are representative of 2 biological replicates.

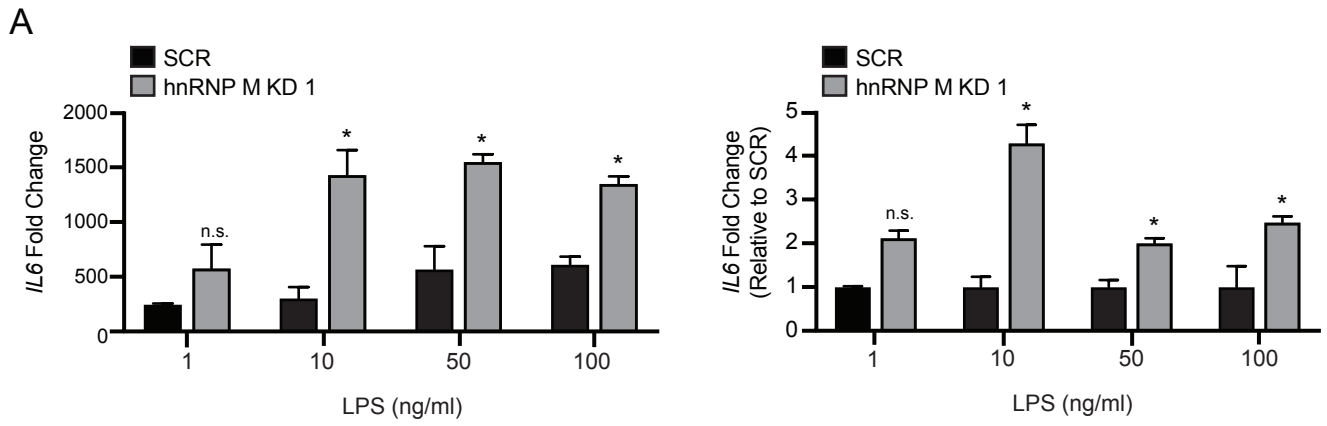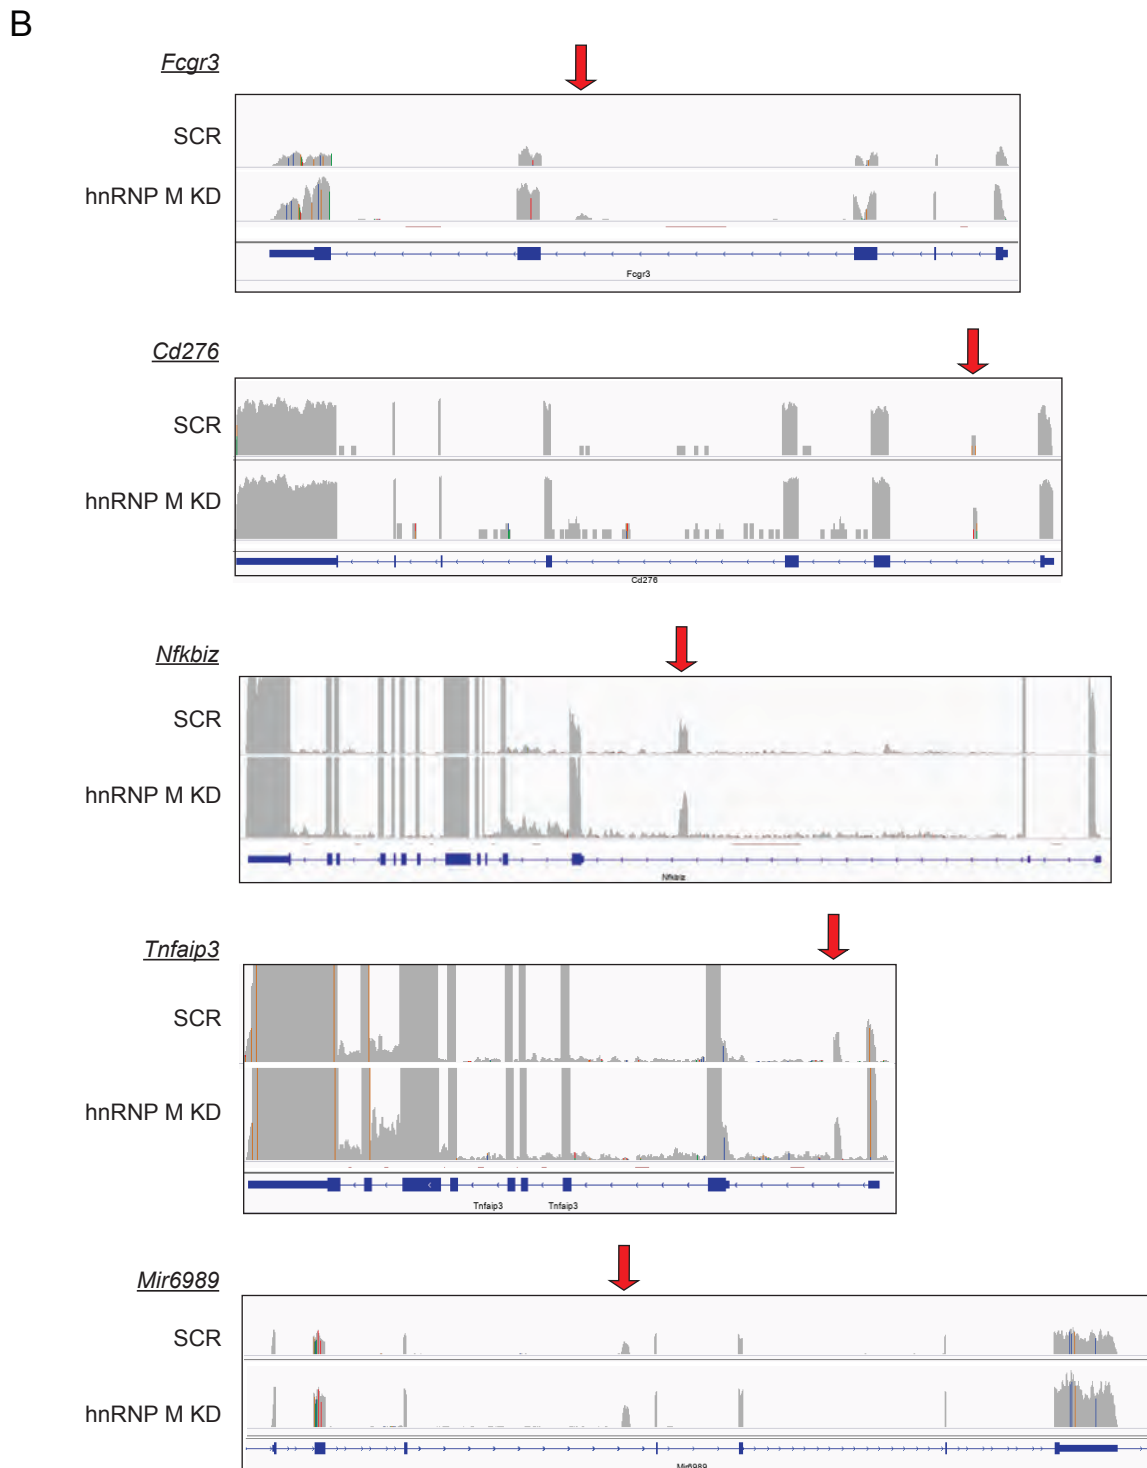

**Figure S7. Related to Figure 7. hnRNP M can respond to low levels of innate immune stimuli and may influence differential inclusion of cryptic exons.**

(a) RT-qPCR of *IL6* mRNA levels in SCR control and hnRNP M KD cells at 2h treated with 100ng/ml, 50ng/ml, 10ng/ml and 1ng/ml. Data is expressed as fold-change over time = 0 as well as fold-change relative to SCR. (a) is representative of 2 biological replicates with values indicating means  $\pm$  SD, n=2. Statistical significance was determined using two-tailed students' *t*-test. \*P < 0.05, \*\*P < 0.01, n.s.= not significant. (b) Screenshots of IGV viewer of *Salmonella*-infected SCR and hnRNP M KD RNA-Seq reads at *Fcgr3*, *Cd276*, *Nfkbiz*, *Tnfaip3*, and *Mir6989*. Red arrows indicate potential cryptic exons.

|                                                                                               |
|-----------------------------------------------------------------------------------------------|
| Primer: <i>Rnf26</i><br>F: AGAGCGGAAGAAGTGTGTTATC<br>R: ATGAGGATCTCAGTGCAAGC                  |
| Primer: <i>Rnf128</i><br>F: CTTCAGTACAAGGAGCAGATGAG<br>R: ATCCACGGCCACAGAATTT                 |
| Primer: <i>Slc6a</i><br>F: GTGTGTGAGGTTTAAGGTGAGTAG<br>R: CAGAGGCCATTAGTGACATACC              |
| Primer: <i>IL6</i> exon 1<br>F: GGGATGTCTGTAGCTCATTCTG<br>R: AGAGGAACTTCATAGCGGTTTC           |
| Primer: <i>IL6</i> intron 1<br>F: GCCCAACTGTGCTATCTGCT<br>R: TCAGTCCCAAGAAGGCAACT             |
| Primer: <i>IL6</i> exon 2<br>F: AGTTGCCTTCTTGGGACTGA<br>R: GTCTCCTCTCCGGACTTGTG               |
| Primer: <i>IL6</i> exon junction 1-2<br>F: GTCAATTCCAGAAACCGCTATG<br>R: GGACTTGTGAAGTAGGGAAGG |
| Primer: <i>IL6</i> exon 2<br>F: TTGCCTTCTTGGGACTGATG<br>R: TTAAGCCTCCGACTTGTGAAG              |
| Primer: <i>IL6</i> intron 2<br>F: TGGTGCTTGTGTAAGAGGTG<br>R: TGCAAGTGCATCATCGTTGT             |
| Primer: <i>IL6</i> exon junction 2-3<br>F: CTTCACAAGTCGGAGGCTTAAT<br>R: GCAAGTGCATCATCGTTGTTT |
| Primer: <i>IL6</i> exon 3<br>F: GCAATGGCAATTCTGATTGTATGC<br>R: ATCCAGTTTGGTAGCATCCATC         |
| Primer: <i>IL6</i> intron 3<br>F: GAAAGAACTGACTTCCTTTTCCA<br>R: GGACTCCAGAAGACCAGAGGA         |
| Primer: <i>IL6</i> exon 4<br>F: TTTCTCTGGTCTTCTGGAGTA<br>R: TGTATCTCTCTGAAGGACTCTGG           |
| Primer: <i>IL6</i> intron 4<br>F: TGTGCAATATTTAACCAGTCTTTG<br>R: GGAAATTGGGGTAGGAAGGA         |
| Primer: <i>IL6</i> exon junction 3-4<br>F: GAAATGATGGATGCTACCAAAGT<br>R: ACTCCAGAAGACCAGAGGAA |
| Primer: <i>IL6</i> exon 5<br>F: CCCAATTTCCAATGCTCTCCTA<br>R: GGTTTGCCGAGTAGATCTCAA            |
| Primer: <i>IL6</i> exon junction 4-5<br>F: ACAAAGCCAGAGTCCTTCAG<br>R: GTTAGGAGAGCATTGGAAATTGG |

|                                                                                                   |
|---------------------------------------------------------------------------------------------------|
| Primer: <i>Mx1</i><br>F: TCTGAGGAGAGCCAGACGAT<br>R: ACTCTGGTCCCAATGACAG                           |
| Primer: <i>TNF</i><br>F: ATGGCCTCCCTCTCATCAGT<br>R: GTTTGCTACGACGTGGGCTA                          |
| Primer: <i>Gbp5</i> exon 4<br>F: AGGAGGCATCCAGGTCAAC<br>R: TGTGTTCTCTATGGAAGGCAGA                 |
| Primer: <i>Ifn<math>\beta</math></i> set 1<br>F: GCAAGCTCAGGATCGCTATTA<br>R: GGGACTCTTCCATCCTGAGT |
| Primer: <i>IRF7</i><br>F: CTTCAGCACTTTCTTCCGAGA<br>R: TGTAGTGTGGTGACCCTTGC                        |
| Primer: <i>Commd8</i><br>F (exon 3): TGAGTGGAAGCATGTTCTCG<br>R (exon 5): GCTGCGCACAAGAAATATCA     |
| Primer: <i>Nmt2</i><br>F (exon 3): CATCTGGCAGCAGATTTTCAG<br>R (exon 5): GTGGCCTCATCAATGTTCTT      |
| Primer: <i>IFIT</i><br>F: AGCTTTAGGGCAAGGAGAAC<br>R: CGTAGCCTATCGCCAAGATTTA                       |
| Primer: <i>hnRNP M</i> KD check<br>F: TTTGACCGAGCCATTGAGAT<br>R: CTTCTGGCTACTCCAGGTG              |
| Primer: <i>Adora2a</i> set 3<br>F: GCTATTGCCATCGACAGATACA<br>R: GTACCACGTCCTCAAACAGAC             |
| Primer: <i>Marcks</i> set 2<br>F: GTGCCAGTTCTCCAAGAC<br>R: TTTACGTGGCCATTCTCCTG                   |
| CHIP Primer: IL6 1<br>F: CAGCAGTGGGATCAGCACTAA<br>R: CCCAGTGGTCTCTTGGCTATC                        |
| CHIP Primer: IL6 2<br>F: TGAGGCTAGCCCTAAGAAGCA<br>R: CCATCAAGACATGCTCAAGTGC                       |
| CHIP Primer: IL6 3<br>F: GAAAACCGGCAAGTGAGCAG<br>R: CCTCTGGCGGAGCTATTGAG                          |
| CHIP Primer: IL6 4<br>F: TTTGAGTGGAGGTTGGGAAGG<br>R: TGAGGGAAAAGGAATCCCCAC                        |
| CHIP Primer: IL6 5<br>F: TTTGACTCTGCTTGACAGAAAGG<br>R: TGGTTCTACACCCCAGACCT                       |
| CHIP Primer: IL6 6<br>F: AACGATGATGCACTTGCAGA<br>R: ACGTGCAAGAGAGAACCTTGA                         |

|                                                                                                                                                                                |
|--------------------------------------------------------------------------------------------------------------------------------------------------------------------------------|
| <p>CHIP Primer: IL6 7<br/> F: ACAGGTAAAGGCCCACTATGC<br/> R: GTGTAGGCCTGGATCCTTCC</p>                                                                                           |
| <p>CHIP Primer: IL6 8<br/> F: GGGAAGGAGTGAGGGTCAGAA<br/> R: GCATCAGCTGACCTCCTGAATTA</p>                                                                                        |
| <p>CHIP Primer: IL6 9<br/> F: TCCCTAGGTGGGGTAGTCTC<br/> R: GGGGAACAAAATACCCATGGAAG</p>                                                                                         |
| <p>CHIP Primer: IL6 end<br/> F: AGTGGCAGACAGAACAGTAAGG<br/> R: TTTGACTCACCCAAGCCAGG</p>                                                                                        |
| <p>CHIP Primer: Intergenic Control<br/> F: ATTTTGTGCTGCATAACCTCCT<br/> R: TAGCAACATCCTAAGCTGGACA</p>                                                                           |
| <p>Primer: VSV-G<br/> F: CAAGTCAAATGCCCAAGAGTCACA<br/> R: TTTCTTGCATTGTTCTACAGATGG</p>                                                                                         |
| <p>Primer: VSV-M<br/> F: ATGATCCGAATCAATTAAGATATG<br/> R: GGGACGTTTCCCTGCCATTCCGATG</p>                                                                                        |
| <p>Primer: shRNA pSICO SCR:<br/> F: TCCTAGGTTAAGTCGCCCTTTCAAGAGATAGA<br/> AGGGCGACTTAACCTAGGTTTTTTC<br/> R: TCGAGAAAAAACCTAGGTTAAGTCGCCCTTCTTTGAA<br/> AGGGCGACTTAACCTAGGA</p> |
| <p>Primer: shRNA hnRNP M1:<br/> F: TGGAAGATGCTAAAAGGACAATTCAAGAGATTGTCCTT<br/> TAGCATCTTCCTTTTTTC<br/> R: TCGAGAAAAAAGGAAGATGCTAAAGGACAATCTCTTGA<br/> ATTGTCCTTTAGCATCTTCC</p> |
| <p>Primer: shRNA hnRNP M2:<br/> F: TGCACAGTATTTGTAGCAAATTCAGAGATTTGCTAC<br/> AAATACTGTGCTTTTTTC<br/> R: TCGAGAAAAAAGCACAGTATTTGTAGCAAATCTCTTGA TTTGCTACAAATACTGTGC</p>         |

Table S4
